# Supplementary material for: Characterization of a Protein Kinase B Inhibitor In Vitro and in Insulin-Treated Liver Cells
Source: Oxford University Press journal article supplement (doi:10.2337/db07-0343), 2007-08-28
Supplement: db070343onlineappendix.doc [file db070343onlineappendix.doc]

Abbreviations for kinases used in Table 1:

|  | Protein Kinase | Full Name |
| --- | --- | --- |
|  |  |  |
| 1 | MKK1/MEK | MAPK kinase |
| 2 | MAPK2/ERK2 | mitogen-activated protein kinase |
| 3 | JNK1alpha1/SAPK1c | c-Jun N-terminal kinase |
| 4 | SAPK2a/p38 | stress-activated protein kinase-2a |
| 5 | SAPK2b/p38beta | stress-activated protein kinase-2b |
| 6 | SAPK3/p38gamma | stress-activated protein kinase-3 |
| 7 | SAPK4/p38delta | stress-activated protein kinase-4 |
| 8 | MAPKAP-K1a/RSK1 | MAPK-activated protein kinase-1a |
| 9 | MAPKAP-K2 (delta 1-45) | MAPK-activated protein kinase-2 |
| 10 | MSK1 | mitogen and stress-activated protein kinase-1 |
| 11 | PRAK | p38-regulated/activated kinase |
| 12 | PKA | cyclic AMP-dependent protein kinase |
| 13 | PKCalpha | protein kinase C |
| 14 | PDK1 (delta 1-51) | 3-phosphoinositide-dependent protein kinase-1 |
| 15 | ∆PH-PKBalpha (S473D) | protein kinase B |
| 16 | SGK1 (delta 1-59; S422D) | serum and glucocorticoid-induced kinase |
| 17 | S6K1/p70S6K (aa 1-421; T412E) | p70 ribosomal protein S6 kinase |
| 18 | GSK3beta | glycogen synthase kinase-3-beta |
| 19 | ROCK-II (ROKa) | Rho-dependent protein kinase |
| 20 | AMPK | AMP-activated protein kinase |
| 21 | CHK1 | checkpoint kinase-1 |
| 22 | CK2 | casein kinase-2 |
| 23 | PBK | phosphorylase B kinase |
| 24 | LCK | lymphocyte kinase |
| 25 | CSK | C-terminal Src kinase |
| 26 | CDK2/cyclin A | cyclin-dependent kinase 2-cyclin A complex |
| 27 | CK1delta (aa 1-294) | casein kinase-1 |
| 28 | DYRK1a | Dual specificity tyrosine phosphorylation Regulated Kinase 1A |
| 29 | NEK6 | NIMA related Protein Kinase 6 |
| 30 | NEK2a | NIMA related Protein Kinase 2a |
| 31 | MAPKAP-K1b/RSK2 | MAPK-activated protein kinase-1b |
| 32 | IKKb | IKKbeta |
| 33 | smMLCK | Smooth muscle Myosin Light Chain Kinase |
| 34 | PRK2 | PKC like Kinase 2 |
| 35 | MNK2 alpha | MAP kinase interacting Kinase 2 |
| 36 | CAMK-1 | Calmodulin dependent kinase 1 |
| 37 | PIM2 | PIM2 |
| 38 | NEK7 | NIMA related Protein Kinase 7 |
| 39 | JNK3 alpha 1 | c-Jun N-terminal kinase 3 |
| 40 | MAPKAP-K3 | MAPK-activated protein kinase-3 |
| 41 | ERK8 | mitogen-activated protein kinase 8 |
| 42 | MNK1 | MAP kinase interacting Kinase 1 |
| 43 | SRPK1 | Serine Arginine Protein Kinase |
| 44 | PKBb | Protein kinase B beta |
| 45 | Aurora B | Aurora B |
| 46 | CHK2 | Checkpoint kinase-2 |
| 47 | Src | Src kinase |
| 48 | EF2K | Elongation factor kinase |
| 49 | MARK3 | Microtubile affinity regulating kinase (C-TAK1) |
| 50 | MST2 | Mammalian sterile 20-like 2 (KRS1 or Ser/Thr protein kinase 3) |
| 51 | PKD1 | Protein kinase D 1 |
| 52 | PLK1 | Polo like kinase 1 (Ser/Thr protein kinase 13) |
| 53 | DYRK2 | Dual specificity tyrosine phosphorylation Regulated Kinase 2 |
| 54 | JNK2 | c-Jun N-terminal kinase 2 |
| 55 | DYRK3 | Dual specificity tyrosine phosphorylation Regulated Kinase 3 |
| 56 | HIPK2 | Homeodomain-interacting protein kinase 2 |
| 57 | HIPK3 | Homeodomain-interacting protein kinase 3 |
| 58 | PAK4 | p21 activated kinase 4 |
| 59 | PAK5 | p21 activated kinase 5 |
| 60 | PAK6 | p21 activated kinase 6 |
| 61 | CAMKKa | Calmodulin dependent kinase kinase a |
| 62 | CAMKKb | Calmodulin dependent kinase kinase b |
| 63 | PIM1 | PIM1 |
| 64 | PIM3 | PIM3 |
| 65 | PLK1 (okadaic acid) | Polo like kinase 1 (Ser/Thr protein kinase 13) |
| 66 | BRSK2 | BR serine/threonine kinase 2 |
| 67 | MELK | maternal embryonic leucine zipper kinase |
| 68 | PKC zeta | protein kinase C zeta |
| 69 | Aurora C | Aurora C |
| 70 | ERK1 | mitogen-activated protein kinase 1 |

**Assay Conditions for each protein kinase in Table 1:**

1.MKK1 assay

This is a two-step assay where inactive MAPK (0.06 mg/ml) is activated by MKK1 (diluted in 25 mM Tris, 0.1 mM EGTA, 0.1% -mercaptoethanol, 0.01% Brij35, 1 mg/ml BSA) in 25.5 µl containing 25 mM Tris, 0.1 mM EGTA, 0.01% Brij35, 10 mM magnesium acetate and 0.005 mM ATP. After incubating at room temperature for 30 min, 5 µl from the first reaction is pipetted into 20 µl of the second reaction mix containing (final concentration) 25 mM Tris pH 7.5, 0.1 mM EGTA, 0.1 mM Na3VO4, 0.66 mg/ml myelin basic protein (MBP), 10 mM magnesium acetate and 0.05 mM [33P-ATP] (500 -1000 cpm/pmole) and incubated for 30 min at room temperature. Assays are stopped by addition of 5 µl of 0.5 M (3%) orthophosphoric acid and then harvested onto P81 Unifilter plates with a wash buffer of 50 mM orthophosphoric acid.

2. MAPK2/ERK2 assay.

MAPK/ERK2 (5-20 mU diluted in 50 mM Tris pH 7.5, 0.1 mM EGTA, 0.1 mM Na3VO4, 0.1% -mercaptoethanol, 1 mg/ml BSA) is assayed against MBP in a final volume of 25.5 µl in 25 mM Tris pH 7.5, 0.1 mM EGTA, 0.33 mg/ml MBP, 10 mM magnesium acetate and 0.05 mM [33P-ATP](500 -1000 cpm/pmole) and incubated for 30 min at room temperature. Assays are stopped by addition of 5 µl of 0.5 M (3%) orthophosphoric acid and then harvested onto P81 Unifilter plates with a wash buffer of 50 mM orthophosphoric acid.

3. JNK11/SAPK1c assay.

JNK11/SAPK1c(5-20 mU diluted in 50 mM Tris pH 7.5, 0.1mM EGTA, 1mg/ml BSA, 0.1% -mercaptoethanol) is assayed against ATF2 (activating transcription factor in a final volume of 25.5 µl in 50 mM Tris pH 7.5, 0.1 mM EGTA, 0.1% -Mercaptoethanol, ATF2 (3 µM), 10 mM magnesium acetate and 0.02 mM [33P-ATP] (500 -1000 cpm/pmole) and incubated for 30 min at room temperature. Assays are stopped by addition of 5 µl of 0.5 M (3%) orthophosphoric acid and then harvested onto P81 Unifilter plates with a wash buffer of 50 mM orthophosphoric acid.

4. SAPK 2a/p38 assay.

SAPK 2a/p38 (5-20mU diluted in 50 mM Tris pH 7.5, 0.1 mM EGTA, 0.1 mM Na3VO4, 0.1% -mercaptoethanol, 1 mg/ml BSA) is assayed against MBP in a final volume of 25.5 µl containing 25 mM Tris pH 7.5, 0.1 mM EGTA, 0.33 mg/ml MBP, 10 mM magnesium acetate and 0.05 mM [33P--ATP] (50-1000 cpm/pmole) and incubated for 30 min at room temperature. Assays are stopped by addition of 5 µl of 0.5 M (3%) orthophosphoric acid and then harvested onto P81 Unifilter plates with a wash buffer of 50 mM orthophosphoric acid.

5. SAPK 2b/p38 assay.

SAPK 2b/p38 (5-20 mU diluted in 50 mM Tris pH 7.5, 0.1 mM EGTA, 0.1 mM Na3VO4, 0.1% -mercaptoethanol, 1 mg/ml BSA) is assayed against MBP in a final volume of 25.5µl containing 25 mM Tris pH 7.5, 0.1 mM EGTA, 0.33 mg/ml MBP, 10 mM magnesium acetate and 0.02 mM [33P--ATP] (50-1000 cpm/pmole) and incubated for 30 min at room temperature. Assays are stopped by addition of 5 µl of 0.5 M (3%) orthophosphoric acid and then harvested onto P81 Unifilter plates with a wash buffer of 50 mM orthophosphoric acid.

6. SAPK 3/p38 assay.

SAPK 3/p38 (5-20 mU diluted in 50 mM Tris pH 7.5, 0.1 mM EGTA, 0.1 mM Na3VO4, 0.1% -mercaptoethanol, 1mg/ml BSA) is assayed against MBP in a final volume of 25.5µl containing 25mM Tris pH 7.5, 0.1 mM EGTA, 0.33 mg/ml MBP, 10 mM magnesium acetate and 0.005mM [33P--ATP] (50-1000 cpm/pmole) and incubated for 30 min at room temperature. Assays are stopped by addition of 5 µl of 0.5 M (3%) orthophosphoric acid and then harvested onto P81 Unifilter plates with a wash buffer of 50 mM orthophosphoric acid.

7. SAPK 4/p38‚ assay.

SAPK 4/p38d (5-20 mU diluted in 50 mM Tris pH 7.5, 0.1 mM EGTA, 0.1 mM Na3VO4, 0.1% -mercaptoethanol, 1 mg/ml BSA) is assayed against MBP in a final volume of 25.5 µl containing 25 mM Tris pH 7.5, 0.1 mM EGTA, 0.33 mg/ml MBP, 10 mM magnesium acetate and 0.005 mM [33P--ATP] (50-1000 cpm/pmole) and incubated for 30 min at room temperature. Assays are stopped by addition of 5 µl of 0.5 M (3%) orthophosphoric acid and then harvested onto P81 Unifilter plates with a wash buffer of 50 mM orthophosphoric acid.

8. MAPKAP-K1a assay.

MAPKAP-K1a (5-20 mU diluted in 20 mM MOPS pH 7.5, 1 mM EDTA, 0.01% Brij35, 5% glycerol, 0.1% -mercaptoethanol, 1mg/ml BSA) is assayed against KKLNRTLSVA in a final volume of 25.5 µl containing 50 mM Na--glycerophosphate pH 7.5, 0.5 mM EDTA, 30 µM substrate peptide, 10 mM magnesium acetate and 0.05 mM [33P--ATP] (50-1000 cpm/pmole) and incubated for 40 min at room temperature. Assays are stopped by addition of 5 µl of 0.5 M (3%) orthophosphoric acid and then harvested onto P81 Unifilter plates with a wash buffer of 50 mM orthophosphoric acid.

9. MAPKAP-K1b/RSK2 assay

MAPKAP-K1b (5-20 mU diluted in 20 mM MOPS pH 7.5, 1 mM EDTA, 0.01% Brij35, 5% glycerol, 0.1% -mercaptoethanol, 1mg/ml BSA) is assayed against substrate peptide (KKLNRTLSVA) in a final volume of 25.5µl containing 50 mM Na--glycerophosphate (pH 7.5), 0.5 mM EDTA, 30 µM substrate peptide, 10 mM magnesium acetate and 0.05 mM [33P--ATP] (50-1000 cpm/pmole) and incubated for 30 min at room temperature. Assays are stopped by addition of 5 µl of 0.5 M (3%) orthophosphoric acid and then harvested onto P81 Unifilter plates with a wash buffer of 50 mM orthophosphoric acid.

10. MAPKAP-K2 assay.

MAPKAP-K2 (5-20 mU diluted in 20 mM MOPS pH 7.5, 1 mM EDTA, 0.01% Brij35, 5% glycerol, 0.1% -mercaptoethanol, 1mg/ml BSA) is assayed against KKLNRTLSVA in a final volume of 25.5 *m*l containing 50 mM Na--glycerophosphate pH 7.5, 0.5 mM EDTA, 30 µM substrate peptide, 10 mM magnesium acetate and 0.02 mM [33P--ATP] (50-1000 cpm/pmole) and incubated for 30 min at room temperature. Assays are stopped by addition of 5 µl of 0.5 M (3%) orthophosphoric acid and then harvested onto P81 Unifilter plates with a wash buffer of 50 mM orthophosphoric acid.

11. MSK1 assay.

MSK1 (5-20 mU diluted in 20 mM MOPS pH 7.5, 1 mM EDTA, 0.01% Brij35, 0.1% -mercaptoethanol, 1 mg/ml BSA) is assayed against a modified Crosstide peptide GRPRTSSFAEGKK in a final volume of 25.5 µl containing 8 mM MOPS pH7.0, 0.2 mM EDTA, 30 µM substrate peptide, 10 mM magnesium acetate and 0.02 mM [33P--ATP] (50-1000 cpm/pmole) and incubated for 30 min at room temperature Assays are stopped by addition of 5 µl of 0.5 M (3%) orthophosphoric acid and then harvested onto P81 Unifilter plates with a wash buffer of 50 mM orthophosphoric acid.

12. PKA assay.

PKA (5-20 mU diluted in 20 mM MOPS pH 7.5, 1 mM EDTA, 0.01% Brij35, 0.1% -mercaptoethanol, 1 mg/ml BSA) is assayed against Kemptide (LRRASLG) in a final volume of 25.5 µl containing 8 mM MOPS pH 7.5, 0.2 mM EDTA, 30 µM substrate peptide, 10 mM magnesium acetate and 0.005 mM [33P-ATP] (50-1000 cpm/pmole) and incubated for 30 min at room temperature. Assays are stopped by addition of 5 µl of 0.5 M (3%) orthophosphoric acid and then harvested onto P81 Unifilter plates with a wash buffer of 50 mM orthophosphoric acid.

13. PKC assay.

PKC (5-20 mU diluted in 20 mM Hepes pH 7.4, 0.03% Triton X-100) is assayed against Histone H1 in the presence of PtdSerine and DAG (0.1 mg/ml. and 10 µg/ml) and 0.1 mM CaCl2. The assay is carried out in a final volume of 25.5 µl containing 20 mM Hepes pH 7.4, 0.03% Triton X-100, 0.1 mg/ml Histone H1, 10 mM magnesium acetate and 0.02 mM[33P-ATP] (50-1000 cpm/pmole) and incubated for 30 min at room temperature. Assays are stopped by addition of 5 µl of 0.5 M (3%) orthophosphoric acid and then harvested onto P81 Unifilter plates with a wash buffer of 50 mM orthophosphoric acid.

PtdSer/DAG preparation:- PtdSer stock = 10 mg/ml in MeOH/Chloroform (1:2). Dry down required amount. Resuspend in appropriate volume of 10 mM Hepes pH 7.4. Vortex and briefly sonicate. (2 x 10-15 seconds at 10-15 seconds apart). DAG stock = 10 mg/ml in MeOH/chloroform (1:2). Dry down required amount. Add sonicated PtdSer solution. Vortex and sonicate.

14. PDK1 assay.

PDK1 (5-20 mU diluted in 50 mM Tris pH 7.5, 0.05% -mercaptoethanol, 1 mg/ml BSA) is assayed against PDKtide (KTFCGTPEYLAPEVRREPRILSEEEQ-EMFRDFDYIADWC) in a final volume of 25.5 µl containing 50 mM Tris pH 7.5, 0.05% -mercaptoethanol, 100 µM substrate peptide, 10mM magnesium acetate and 0.02 mM [33P-ATP] (50-1000 cpm/pmole) and incubated for 30 min at room temperature Assays are stopped by addition of 5 µl of 0.5 M (3%) orthophosphoric acid and then harvested onto P81 Unifilter plates with a wash buffer of 50 mM orthophosphoric acid.

15. DPH-PKBS473D assay.

DPH-PKB-S473D (5-20mU diluted in 50 mM Tris pH 7.5, 0.1 mM EGTA, 0.1% -mercaptoethanol, 1 mg/ml BSA) is assayed against a modified Crosstide peptide GRPRTSSFAEGKK in a final volume of 25.5 µl containing 50mM Tris pH 7.5, 0.05% -mercaptoethanol, 30 µM substrate peptide, 10 mM magnesium acetate and 0.005 mM [33P-ATP] (50-1000 cpm/pmole) and incubated for 30 min at room temperature. Assays are stopped by addition of 5 µl of 0.5 M (3%) orthophosphoric acid and then harvested onto P81 Unifilter plates with a wash buffer of 50 mM orthophosphoric acid.

16. DPH-PKBbeta (S474D) assay

DPH-PKBbeta-S474D (5-20mU diluted in 50 mM Tris pH 7.5, 0.1 mM EGTA, 0.1% -mercaptoethanol, 1 mg/ml BSA) is assayed against a modified Crosstide peptide (GRPRTSSFAEGKK) in a final volume of 25.5 µl containing 50mM Tris pH 7.5, 0.05% -mercaptoethanol, 30 ÂµM substrate peptide, 10 mM magnesium acetate and 0.05 mM [33P-ATP] (50-1000 cpm/pmole) and incubated for 30 min at room temperature. Assays are stopped by addition of 5 µl of 0.5 M (3%) orthophosphoric acid and then harvested onto P81 Unifilter plates with a wash buffer of 50 mM orthophosphoric acid.

17. S6K1/ P70 S6K assay.

S6K1/P70 S6K (5-20 mU diluted in 20 mM MOPS pH 7.5, 1 mM EDTA, 0.01% Brij35, 5% glycerol, 0.1% -mercaptoethanol, 1 mg/ml BSA) is assayed against substrate peptide (KKRNRTLTV) in a final volume of 25.5 µl containing 8 mM MOPS pH 7.0, 0.2 mM EDTA, 0.1 mM substrate peptide, 10 mM magnesium acetate and 0.02 mM [33P-ATP] (50-1000 cpm/pmole) and incubated for 30 min at room temperature. Assays are stopped by addition of 5 µl of 0.5 M (3%) orthophosphoric acid and then harvested onto P81 Unifilter plates with a wash buffer of 50 mM orthophosphoric acid.

18. GSK3 assay.

GSK3 (5-20 mU diluted in 20 mM MOPS pH 7.5, 1 mM EDTA, 0.01% Brij35, 5% glycerol, 0.1% -mercaptoethanol, 1 mg/ml BSA) is assayed against Phospho-GS2 peptide (YRRAAVPPSPSLSRHSSPHQS(PO4)EDEEE) in a final volume of 25.5 µl containing 8 mM MOPS pH 7.0, 0.2 mM EDTA, 20 µM Phospho GS2 peptide, 10 mM magnesium acetate and 0.005 mM [33P-ATP] (50-1000 cpm/pmole) and incubated for 30 min at room temperature. Assays are stopped by addition of 5 µl of 0.5 M (3%) orthophosphoric acid and then harvested onto P81 Unifilter plates with a wash buffer of 50 mM orthophosphoric acid.

19. ROCK-II (ROK) assay.

ROCK (ROKa) (5-20 mU diluted in 50 mM Tris pH 7.5, 0.1 mM EGTA, 0.1% -mercaptoethanol, 1 mg/ml BSA) is assayed against Long S6 substrate peptide (KEAKEKRQEQIAKRRRLSSLRASTSKSGGSQK) in a final volume of 25.5 µl containing 50 mM Tris pH 7.5, 0.1 mM EGTA, 30 µM Long S6 substrate peptide, 10 mM magnesium acetate and 0.02 mM [33P-ATP] (50-1000 cpm/pmole) and incubated for 30 min at room temperature. Assays are stopped by addition of 5 µl of 0.5 M (3%) orthophosphoric acid and then harvested onto P81 Unifilter plates with a wash buffer of 50 mM orthophosphoric acid.

20. AMPK assay.

AMPK (5-20 mU diluted in 50 mM Hepes pH 7.5, 1 mM DTT, 0.02% Brij35) is assayed against SAMS substrate peptide (HMRSAMSGLHLVKRR) in a final volume of 25.5 µl containing 50 mM Hepes pH 7.5, 1 mM DTT, 0.02% Brij35, 0.4 mM SAMS peptide, 0.196 mM AMP, 10 mM magnesium acetate and 0.05 mM [33P-ATP] (50-1000 cpm/pmole) and incubated for 30 min at room temperature. Assays are stopped by addition of 5 µl of 0.5 M (3%) orthophosphoric acid and then harvested onto P81 Unifilter plates with a wash buffer of 50 mM orthophosphoric acid.

21. CHK1 assay.

CHK1 (5-20 mU diluted in 20 mM MOPS pH 7.5, 1 mM EDTA, 0.1% -mercaptoethanol, 0.01% Brij-35, 5% glycerol, 1 mg/ml BSA) is assayed against CHKtide substrate peptide (KKKVSRSGLYRSPSMPENLNRPR) in a final volume of 25.5 µl containing 8 mM MOPS pH 7.0, 0.2 mM EDTA, 200 µM CHKtide, 10 mM magnesium acetate and 0.02 mM [33P-ATP](50-1000 cpm/pmole) and incubated for 30 min at room temperature. Assays are stopped by addition of 5 µl of 0.5 M (3%) orthophosphoric acid and then harvested onto P81 Unifilter plates with a wash buffer of 50 mM orthophosphoric acid.

22. CK2 assay.

CK2 (5-20 mU diluted in 20 mM Hepes pH7.5, 0.15 M NaCl, 0.1 mM EGTA, 0.1% Triton X-100, 5 mM DTT, 50% glycerol) is assayed against CKII peptide (RRRDDDSDDD) in a final volume of 25.5 µl containing 20 mM Hepes pH 7.5, 0.15 M NaCl, 0.1 mM EDTA, 5 mM DTT, 0.1% Triton-X 100, CKII peptide (0.165 mM), 10 mM magnesium acetate and 0.005 mM [33P-ATP](500 -1000 cpm/pmole) and incubated for 30 min at room temperature. Assays are stopped by addition of 5 µl of 0.5 M (3%) orthophosphoric acid and then harvested onto P81 Unifilter plates with a wash buffer of 50 mM orthophosphoric acid.

23. PBK assay.

PBK (5-20 mU diluted in 50 mM Na--glycerophosphate pH 7.0, 0.1% -mercaptoethanol) is assayed against phosphorylase b peptide (KRKQISVRGL) in a final volume of 25.5 µl containing 50 mM Tris pH 8.6, 50 mM Na--glycerophosphate, 0.04 mM CaCl2, phosphorylase b peptide (0.196 mM), 10 mM magnesium acetate, 0.02 mM [33P-ATP] (500 -1000 cpm/pmole) then incubated for 15 min at room temperature. Assays are stopped by addition of 5 µl of 0.5 M (3%) orthophosphoric acid and then harvested onto P81 Unifilter plates with a wash buffer of 50 mM orthophosphoric acid.

24. LCK assay.

LCK (5-20 mU diluted in 20 mM MOPS pH 7.5, 1 mM EDTA, 0.01% Brij35, 5% glycerol, 0.1% -mercaptoethanol, 1 mg/ml BSA) is assayed against Cdc2 peptide (KVEKIGEGTYGVVYK) in a final volume of 25.5 µl containing 50 mM Tris pH 7.5, 0.1 mM EGTA, 0.1 mM Na3Vo4, Cdc2 peptide (0.25 mM), 10 mM magnesium acetate and 0.05mM [33P-ATP](500-1000 cpm/pmole) and incubated for 15 min at room temperature Assays are stopped by addition of 5 µl of 0.5 M (3%) orthophosphoric acid and then harvested onto P81 Unifilter plates with a wash buffer of 50 mM orthophosphoric acid.

25. CSK assay.

CSK (5-20 mU diluted in 20 mM MOPS pH7.5, 1mM EDTA, 0.01% Brij35, 5% glycerol, 0.1% -mercaptoethanol, 1 mg/ml BSA) is assayed against Cdc2 peptide (KVEKIGEGTYGVVYK) in a final volume of 25.5 µl containing 8 mM MOPS pH7.0, 0.2 mM EDTA, Cdc2 peptide (0.25 mM), 10 mM magnesium acetate and 0.02 mM [33P-ATP](500 -1000 cpm/pmole) and incubated for 30 min at room temperature Assays are stopped by addition of 5 µl of 0.5 M (3%) orthophosphoric acid and then harvested onto P81 Unifilter plates with a wash buffer of 50 mM orthophosphoric acid.

26. CDK2/cyclin A assay.

CDK2/cyclin A (5-20 mU diluted in 50 mM Hepes pH 7.5, 1 mM DTT, 0.02% Brij35, 100 mM NaCl) is assayed against Histone H1 in a final volume of 25.5 µl containing 50 mM Hepes pH7.5, 1 mM DTT, 0.02% Brij35, 100 mM NaCl, Histone H1 (1 mg/ml), 10 mM magnesium acetate and 0.02 mM [33P-ATP](500-1000 cpm/pmole) and incubated for 30 min at room temperature. Assays are stopped by addition of 5 µl of 0.5 M (3%) orthophosphoric acid and then harvested onto P81 Unifilter plates with a wash buffer of 50 mM orthophosphoric acid.

27. DYRK 1A assay.

DYRK 1A (5-20 mU of diluted in 50 mM Tris pH7.5, 0.1 mM EGTA) is assayed against Woodtide (KKISGRLSPIMTEQ) in a final volume of 25.5µl containing 50 mM Tris pH 7.5, 0.1 mM EGTA, 350 µM substrate peptide, 10 mM Magnesium acetate and 0.05 mM [33P--ATP](50-1000 cpm/pmole) and incubated for 30 min at room temperature. Assays are stopped by addition of 5 µl of 0.5 M (3%) orthophosphoric acid and then harvested onto P81 Unifilter plates with a wash buffer of 50 mM orthophosphoric acid.

28. DYRK2 assay

DYRK2 (5-20 mU of diluted in 50 mM Tris pH7.5, 0.1 mM EGTA) is assayed against Woodtide (KKISGRLSPIMTEQ) in a final volume of 25.5µl containing 50 mM Tris pH 7.5, 0.1 mM EGTA, 350 µM substrate peptide, 10 mM Magnesium acetate and 0.05 mM [33P--ATP](50-1000 cpm/pmole) and incubated for 30 min at room temperature. Assays are stopped by addition of 5 µl of 0.5 M (3%) orthophosphoric acid and then harvested onto P81 Unifilter plates with a wash buffer of 50 mM orthophosphoric acid.

29. DYRK3 assay

DYRK3 (5-20 mU of diluted in 50 mM Tris pH7.5, 0.1 mM EGTA) is assayed against Woodtide (KKISGRLSPIMTEQ) in a final volume of 25.5µl containing 50 mM Tris pH 7.5, 0.1 mM EGTA, 350 µM substrate peptide, 10 mM Magnesium acetate and 0.005 mM [33P--ATP](50-1000 cpm/pmole) and incubated for 30 min at room temperature. Assays are stopped by addition of 5 µl of 0.5 M (3%) orthophosphoric acid and then harvested onto P81 Unifilter plates with a wash buffer of 50 mM orthophosphoric acid.

30. NEK2a assay

5-20mU of NEK2a (diluted in 50mM Tris (pH 7.5), 0.1mM EGTA, 1mg/ml BSA, 0.1%,-Mercaptoethanol) is assayed against NEK2a peptide (RFRRSRRMI) in a final volume of 25.5µl containing 50mM Tris (pH 7.5), 0.1mM EGTA, 0.01% Brij, 0.1%, -Mercaptoethanol, 300µM NEK2a peptide, 10 mM magnesium acetate and 0.05 mM [33P-ATP]( 500-1000 cpm/pmole) and incubated for 30 mins at room temperature. Assays are stopped by addition of 5µl of 0.5M (3%) orthophosphoric acid. Assays are harvested onto P81 Unifilter plates using a wash buffer of 50mM orthophosphoric acid.

31. NEK6 assay

NEK6 (5-20 mU diluted in 50mM Tris (pH 7.5), 0.1mM EGTA, 1mg/ml BSA, 0.1%,-Mercaptoethanol) is assayed against NEK6 peptide (FLAKSFGSPNRAYKK) in a final volume of 25.5µl containing 50mM Tris (pH 7.5), 0.1mM EGTA, 0.01% Brij, 0.1%, -Mercaptoethanol, NEK6 peptide (0.3 mM), 10 mM magnesium acetate and 0.05 mM [33P-ATP]( 500-1000 cpm/pmole) and incubated for 30 min at room temperature. Assays are stopped by addition of 5 µl of 0.5 M (3%) orthophosphoric acid and then harvested onto P81 Unifilter plates with a wash buffer of 50 mM orthophosphoric acid.

32. IKKb assay

5-20mU of IKKb (diluted in 50mM Tris (pH 7.5), 0.1mM EGTA, 1mg/ml BSA, 0.1%,-Mercaptoethanol) is assayed against substrate peptide (LDDRHDSGLDSMKDEEY) in a final volume of 25.5µl containing 50mM Tris (pH 7.5), 0.1mM EGTA, 0.1%, -Mercaptoethanol, 300µM substrate peptide, 10 mM magnesium acetate and 0.005 mM [33P-ATP]( 500-1000 cpm/pmole) and incubated for 30 min at room temperature. Assays are stopped by addition of 5µl of 0.5M (3%) orthophosphoric acid. Assays are harvested onto P81 Unifilter plates using a wash buffer of 50mM orthophosphoric acid.

33. CK1 assay

CK1 (5-20 mU diluted in 20 mM Hepes pH7.5, 0.15 M NaCl, 0.1 mM EGTA, 0.1% Triton X-100, 5 mM DTT, 50% glycerol) is assayed against CKI peptide (RRKDLHDDEEDEAMSITA) in a final volume of 25.5 µl containing 20 mM Hepes pH 7.5, 0.15 M NaCl, 0.1 mM EDTA, 5 mM DTT, 0.1% Triton-X 100, CKI peptide (0.5 mM), 10 mM magnesium acetate and 0.02 mM [33P-ATP](500 -1000 cpm/pmole) and incubated for 30 min at room temperature. Assays are stopped by addition of 5 µl of 0.5 M (3%) orthophosphoric acid and then harvested onto P81 Unifilter plates with a wash buffer of 50 mM orthophosphoric acid.

34. smMLCK assay

5-20mU of smMLCK (diluted in 50mM Hepes (pH 7.5), 0.1mM EGTA, 1mg/mlBSA, 0.1%,-Mercaptoethanol) is assayed against substrate peptide (KKRPQRATSNVFA) in a final volume of 25.5µl containing 50mM Hepes (pH 7.5), 0.1mM EGTA, 5mM CaCl2, 10µM Calmodulin, 300µM substrate peptide, 10 mM magnesium acetate and 0.05 mM [33P-ATP]( 500-1000 cpm/pmole) and incubated for 30 min at room temperature. Assays are stopped by addition of 5µl of 0.5M (3%) orthophosphoric acid. Assays are harvested onto P81 Unifilter plates using a wash buffer of 50mM orthophosphoric acid.

35. PRK2 assay

5-20mU of PRK2 (diluted in 50mM Tris (pH 7.5), 0.1mM EGTA, 1mg/ml BSA, 0.1%,-Mercaptoethanol) is assayed against Long S6 peptide (KEAKEKRQEQIAKRRRLSSLRASTSKSGGSQK) in a final volume of 25.5µl containing 50mM Tris (pH 7.5), 0.1mM EGTA, 0.1%, -Mercaptoethanol, 30µM Long S6 peptide, 10 mM magnesium acetate and 0.005 mM [33P-ATP]( 500-1000 cpm/pmole) and incubated for 30 min at room temperature. Assays are stopped by addition of 5µl of 0.5M (3%) orthophosphoric acid. Assays are harvested onto P81 Unifilter plates using a wash buffer of 50mM orthophosphoric acid.

36. MNK2 alpha assay

5-20mU of MNK2 (diluted in 50mM Tris (pH 7.5), 0.1mM EGTA, 1mg/ml BSA, 0.1%,-Mercaptoethanol) is assayed against substrate peptide (eIF4E) in a final volume of 25.5µl containing 50mM Tris (pH 7.5), 0.1mM EGTA, 0.1%, -Mercaptoethanol, 0.5mg/ml substrate peptide, 10 mM magnesium acetate and 0.05 mM [33P-ATP]( 500-1000 cpm/pmole) and incubated for 30 min at room temperature. Assays are stopped by addition of 5µl of 0.5M (3%) orthophosphoric acid. Assays are harvested onto P81 Unifilter plates using a wash buffer of 50mM orthophosphoric acid.

37. Aurora B assay

Aurora B (5-20mU diluted in 50 mM Tris pH 7.5, 0.1 mM EGTA, 0.1% -mercaptoethanol, 1 mg/ml BSA) is assayed against a substrate peptide (LRRLSLGLRRLSLGLRRLSLGLRRLSLG) in a final volume of 25.5 µl containing 50mM Tris pH 7.5, 0.05% -mercaptoethanol, 300 µM substrate peptide, 10 mM magnesium acetate and 0.02 mM [33P-ATP] (50-1000 cpm/pmole) and incubated for 30 min at room temperature. Assays are stopped by addition of 5 µl of 0.5 M (3%) orthophosphoric acid and then harvested onto P81 Unifilter plates with a wash buffer of 50 mM orthophosphoric acid.

38. CAMK-1 assay

5-20mU of CAMK-1 (diluted in 50mM Tris (pH 7.5), 0.1mM EGTA, 1mg/ml BSA, 0.1%,-Mercaptoethanol) is assayed against substrate peptide (YLRRRLSDSNF) in a final volume of 25.5µl containing 50mM Tris (pH 7.5), 0.1mM EGTA, 0.5mM CaCl2, 0.3µM calmodulin, 0.1%, -Mercaptoethanol, 300µM substrate peptide, 10 mM magnesium acetate and 0.05 mM [33P-ATP]( 500-1000 cpm/pmole) and incubated for 30 min at room temperature. Assays are stopped by addition of 5µl of 0.5M (3%) orthophosphoric acid. Assays are harvested onto P81 Unifilter plates using a wash buffer of 50mM orthophosphoric acid.

39. CHK2 assay

CHK2 (5-20 mU diluted in 20 mM MOPS pH 7.5, 1 mM EDTA, 0.1% -mercaptoethanol, 0.01% Brij-35, 5% glycerol, 1 mg/ml BSA) is assayed against CHKtide substrate peptide (KKKVSRSGLYRSPSMPENLNRPR) in a final volume of 25.5 µl containing 8 mM MOPS pH 7.0, 0.2 mM EDTA, 200 µM CHKtide, 10 mM magnesium acetate and 0.02 mM [33P-ATP](50-1000 cpm/pmole) and incubated for 30 min at room temperature Assays are stopped by addition of 5 µl of 0.5 M (3%) orthophosphoric acid and then harvested onto P81 Unifilter plates with a wash buffer of 50 mM orthophosphoric acid.

40. PIM2 assay

5-20mU of PIM2 (diluted in 50mM Tris (pH 7.5), 0.1mM EGTA, 1mg/ml BSA, 0.1%,-Mercaptoethanol) is assayed against substrate peptide (**RSRHSSYPAGT**) in a final volume of 25.5µl containing 50mM Tris (pH 7.5), 0.1mM EGTA, 0.5mM CaCl2, 0.3ÂµM calmodulin, 0.1%, -Mercaptoethanol, 300µM substrate peptide, 10 mM magnesium acetate and 0.005 mM [33P-ATP]( 500-1000 cpm/pmole) and incubated for 30 mins at room temperature. Assays are stopped by addition of 5µl of 0.5M (3%) orthophosphoric acid. Assays are harvested onto P81 Unifilter plates using a wash buffer of 50mM orthophosphoric acid.

41. Src assay

Src (5-20mU diluted in 50 mM Tris pH 7.5, 0.1 mM EGTA, 0.1% -mercaptoethanol, 1 mg/ml BSA) is assayed against a substrate peptide (KVEKIGEGTYGVVYK) in a final volume of 25.5 µl containing 50mM Tris pH 7.5, 0.05% -mercaptoethanol, 300 µM substrate peptide, 10 mM magnesium acetate and 0.05 mM [33P-ATP] (50-1000 cpm/pmole) and incubated for 30 min at room temperature. Assays are stopped by addition of 5 µl of 0.5 M (3%) orthophosphoric acid and then harvested onto P81 Unifilter plates with a wash buffer of 50 mM orthophosphoric acid.

42. NEK7 assay

NEK7 (5-20 mU diluted in 50mM Tris (pH 7.5), 0.1mM EGTA, 1mg/ml BSA, 0.1%,-Mercaptoethanol) is assayed against substrate peptide (FLAKSFGSPNRAYKK) in a final volume of 25.5µl containing 50mM Tris (pH 7.5), 0.1mM EGTA, 0.01% Brij, 0.1%, -Mercaptoethanol, substrate peptide (0.3 mM), 10 mM magnesium acetate and 0.02 mM [33P-ATP]( 500-1000 cpm/pmole) and incubated for 30 min at room temperature. Assays are stopped by addition of 5 µl of 0.5 M (3%) orthophosphoric acid and then harvested onto P81 Unifilter plates with a wash buffer of 50 mM orthophosphoric acid.

43. JNK3 alpha 1 assay

JNK3 alpha 1(5-20 mU diluted in 50 mM Tris (pH 7.5), 0.1mM EGTA, 1mg/ml BSA, 0.1% -mercaptoethanol) is assayed against ATF2 (activating transcription factor in a final volume of 25.5 µl in 50 mM Tris pH 7.5, 0.1 mM EGTA, 0.1% -Mercaptoethanol, ATF2 (3 µM), 10 mM magnesium acetate and 0.05 mM [33P-ATP] (500 -1000 cpm/pmole) and incubated for 30 min at room temperature. Assays are stopped by addition of 5 µl of 0.5 M (3%) orthophosphoric acid and then harvested onto P81 Unifilter plates with a wash buffer of 50 mM orthophosphoric acid.

44. MAPKAP-K3 assay

5-20mU of MAPKAP-K3 (diluted in 50mM Tris (pH 7.5), 0.1mM EGTA, 1mg/ml BSA, 0.1%,-Mercaptoethanol) is assayed against substrate peptide (KKLNRTLSVA) in a final volume of 25.5µl containing 50mM Tris (pH 7.5), 0.1mM EGTA, 0.1%, -Mercaptoethanol, 30µM substrate peptide, 10 mM magnesium acetate and 0.02 mM [33P-ATP]( 500-1000 cpm/pmole) and incubated for 30 min at room temperature. Assays are stopped by addition of 5µl of 0.5M (3%) orthophosphoric acid. Assays are harvested onto P81 Unifilter plates using a wash buffer of 50mM orthophosphoric acid.

45. ERK8 assay

5-20mU of ERK8 (diluted in 50mM Tris (pH 7.5), 0.1mM EGTA, 1mg/ml BSA, 0.1%,-Mercaptoethanol) is assayed against MBP in a final volume of 25.5µl containing 50mM Tris (pH 7.5), 0.1mM EGTA, 0.1%, -Mercaptoethanol, 0.33mg/ml MBP, 10 mM magnesium acetate and 0.005 mM [33P-ATP]( 500-1000 cpm/pmole) and incubated for 30 min at room temperature. Assays are stopped by addition of 5µl of 0.5M (3%) orthophosphoric acid. Assays are harvested onto P81 Unifilter plates using a wash buffer of 50mM orthophosphoric acid.

46. MNK1 assay

5-20mU of MNK1 (diluted in 50mM Tris (pH 7.5), 0.1mM EGTA, 1mg/ml BSA, 0.1%,-Mercaptoethanol) is assayed against substrate peptide (eIF4E) in a final volume of 25.5µl containing 50mM Tris (pH 7.5), 0.1mM EGTA, 0.1%, -Mercaptoethanol, 0.5mg/ml substrate peptide, 10 mM magnesium acetate and 0.05 mM [33P-ATP]( 500-1000 cpm/pmole) and incubated for 30 min at room temperature. Assays are stopped by addition of 5µl of 0.5M (3%) orthophosphoric acid. Assays are harvested onto P81 Unifilter plates using a wash buffer of 50mM orthophosphoric acid.

47. SRPK1 assay

5-20mU of SRPK1 (diluted in 50mM Tris (pH 7.5), 0.1mM EGTA, 1mg/ml BSA, 0.1%,-Mercaptoethanol) is assayed against substrate peptide (RSRSRSRSRSRSRSR) in a final volume of 25.5µl containing 50mM Tris (pH 7.5), 0.1mM EGTA, 0.1%, -Mercaptoethanol, 300µM substrate peptide, 10 mM magnesium acetate and 0.05 mM [33P-ATP]( 500-1000 cpm/pmole) and incubated for 30 min at room temperature. Assays are stopped by addition of 5µl of 0.5M (3%) orthophosphoric acid. Assays are harvested onto P81 Unifilter plates using a wash buffer of 50mM orthophosphoric acid.

48. SGK assay.

SGK (5-20mU diluted in 20 mM MOPS pH 7.5, 1mM EDTA, 0.01% Brij35, 5% glycerol, 0.1% -mercaptoethanol, 1 mg/ml BSA) is assayed against a modified Crosstide peptide GRPRTSSFAEGKK in a final volume of 25.5 µl containing 8 mM MOPS pH 7.0, 0.2 mM EDTA, 30 µM substrate peptide, 10 mM magnesium acetate and 0.02 mM [33P-ATP] (50-1000 cpm/pmole) and incubated for 30 min at room temperature. Assays are stopped by addition of 5 µl of 0.5 M (3%) orthophosphoric acid and then harvested onto P81 Unifilter plates with a wash buffer of 50 mM orthophosphoric acid.

49. EF2K assay

EF2K (5-20mU diluted in 50 mM Hepes pH 6.6, 0.1% -mercaptoethanol, 1 mg/ml BSA) is assayed against a substrate peptide (RKKFGESKTKTKEFL) in a final volume of 25.5 µl containing 50mM Hepes pH 6.6, 0.2mM CaCl2, 0.3µM Calmodulin, 0.005% -mercaptoethanol, 300 µM substrate peptide, 10 mM magnesium acetate and 0.05 mM [33P-ATP] (50-1000 cpm/pmole) and incubated for 30 min at room temperature. Assays are stopped by addition of 5 µl of 0.5 M (3%) orthophosphoric acid and then harvested onto P81 Unifilter plates with a wash buffer of 50 mM orthophosphoric acid.

50. MARK3 assay

MARK3 (5-20mU diluted in 50 mM Tris pH 7.5, 0.1 mM EGTA, 0.1% -mercaptoethanol, 1 mg/ml BSA) is assayed against CHKtide substrate (KKKVSRSGLYRSPSMPENLNRPR) in a final volume of 25.5 µl containing 50mM Tris pH 7.5, 0.005% -mercaptoethanol, 300 µM substrate peptide, 10 mM magnesium acetate and 0.05 mM [33P-ATP] (50-1000 cpm/pmole) and incubated for 30 min at room temperature. Assays are stopped by addition of 5 µl of 0.5 M (3%) orthophosphoric acid and then harvested onto P81 Unifilter plates with a wash buffer of 50 mM orthophosphoric acid.

51. MST2 assay

MST2 (5-20mU diluted in 50 mM Tris pH 7.5, 0.1 mM EGTA, 0.1% -mercaptoethanol, 100µM Vanadate) is assayed against MBP in a final volume of 25.5 µl containing 50mM Tris pH 7.5, 0.05% -mercaptoethanol, 0.33mg/ml MBP, 10 mM magnesium acetate and 0.02 mM [33P-ATP] (50-1000 cpm/pmole) and incubated for 30 min at room temperature. Assays are stopped by addition of 5 µl of 0.5 M (3%) orthophosphoric acid and then harvested onto P81 Unifilter plates with a wash buffer of 50 mM orthophosphoric acid.

52. PKD1 assay

PKD1 (5-20mU diluted in 50 mM Tris pH 7.5, 0.1 mM EGTA, 0.1% -mercaptoethanol, 1 mg/ml BSA) is assayed substrate peptide (KKLNRTLSVA) in a final volume of 25.5 µl containing 50mM Tris pH 7.5, 0.05% -mercaptoethanol, 30 µM substrate peptide, 10 mM magnesium acetate and 0.05 mM [33P-ATP] (50-1000 cpm/pmole) and incubated for 30 min at room temperature. Assays are stopped by addition of 5 µl of 0.5 M (3%) orthophosphoric acid and then harvested onto P81 Unifilter plates with a wash buffer of 50 mM orthophosphoric acid.

53. PLK1 assay

PLK1 (5-20mU diluted in 50 mM Tris pH 7.5, 0.1 mM EGTA, 0.1% -mercaptoethanol, 1 mg/ml BSA, 100µM Vanadate) is assayed against a substrate peptide (ISDELMDATFADQEAKKK) in a final volume of 25.5 µl containing 50mM Tris pH 7.5, 0.05% -mercaptoethanol, 10µM Vanadate, 300 µM substrate peptide, 10 mM magnesium acetate and 0.005 mM [33P-ATP] (50-1000 cpm/pmole) and incubated for 30 min at room temperature. Assays are stopped by addition of 5 µl of 0.5 M (3%) orthophosphoric acid and then harvested onto P81 Unifilter plates with a wash buffer of 50 mM orthophosphoric acid.

54. JNK2 assay

JNK2 1(5-20 mU diluted in 50 mM Tris (pH 7.5), 0.1mM EGTA, 1mg/ml BSA, 0.1% -mercaptoethanol) is assayed against ATF2 (activating transcription factor in a final volume of 25.5 µl in 50 mM Tris pH 7.5, 0.1 mM EGTA, 0.1% -Mercaptoethanol, ATF2 (3 µM), 10 mM magnesium acetate and 0.02 mM [33P-ATP] (500 -1000 cpm/pmole) and incubated for 30 min at room temperature. Assays are stopped by addition of 5 µl of 0.5 M (3%) orthophosphoric acid and then harvested onto P81 Unifilter plates with a wash buffer of 50 mM orthophosphoric acid.

55. PRAK assay.

PRAK (5-20mU diluted in 50 mM Na--glycerophosphate pH 7.5, 0.1mM EGTA, 0.1% -mercaptoethanol, 1 mg/ml BSA) is assayed against KKLRRTLSVA in a final volume of 25.5 µl containing 50 mM Na--glycerophosphate pH 7.5, 0.1 mM EGTA, 30 µM substrate peptide, 10 mM magnesium acetate and 0.02 mM [33P--ATP] (50-1000 cpm/pmole) and incubated for 30 min at room temperature. Assays are stopped by addition of 5 µl of 0.5 M (3%) orthophosphoric acid and then harvested onto P81 Unifilter plates with a wash buffer of 50 mM orthophosphoric acid.

56. HIPK2 assay

5-20mU of HIPK2 (diluted in 50mM Tris (pH 7.5), 0.1mM EGTA, 1mg/ml BSA, 0.1%,-Mercaptoethanol) is assayed against MBP in a final volume of 25.5µl containing 50mM Tris (pH 7.5), 0.1mM EGTA, 0.1%, -Mercaptoethanol, 0.33mg/ml MBP, 10 mM magnesium acetate and 0.005 mM [33P-ATP]( 500-1000 cpm/pmole) and incubated for 30 min at room temperature. Assays are stopped by addition of 5µl of 0.5M (3%) orthophosphoric acid. Assays are harvested onto P81 Unifilter plates using a wash buffer of 50mM orthophosphoric acid.

57. HIPK3 assay

5-20mU of HIPK3 (diluted in 50mM Tris (pH 7.5), 0.1mM EGTA, 1mg/ml BSA, 0.1%,-Mercaptoethanol) is assayed against MBP in a final volume of 25.5µl containing 50mM Tris (pH 7.5), 0.1mM EGTA, 0.1%, -Mercaptoethanol, 0.33mg/ml MBP, 10 mM magnesium acetate and 0.02 mM [33P-ATP]( 500-1000 cpm/pmole) and incubated for 30 min at room temperature. Assays are stopped by addition of 5µl of 0.5M (3%) orthophosphoric acid. Assays are harvested onto P81 Unifilter plates using a wash buffer of 50mM orthophosphoric acid.

58. PAK4 assay

PAK4 (5-20mU diluted in 50 mM Tris pH 7.5, 0.1 mM EGTA, 0.1% -mercaptoethanol, 1 mg/ml BSA) is assayed against a substrate peptide (RRRLSFAEPG) in a final volume of 25.5 µl containing 50mM Tris pH 7.5, 0.05% -mercaptoethanol, 300 µM substrate peptide, 10 mM magnesium acetate and 0.005 mM [33P-ATP] (50-1000 cpm/pmole) and incubated for 30 min at room temperature. Assays are stopped by addition of 5 µl of 0.5 M (3%) orthophosphoric acid and then harvested onto P81 Unifilter plates with a wash buffer of 50 mM orthophosphoric acid.

59. PAK5 assay

PAK5 (5-20mU diluted in 50 mM Tris pH 7.5, 0.1 mM EGTA, 0.1% -mercaptoethanol, 1 mg/ml BSA) is assayed against a substrate peptide (RRRLSFAEPG) in a final volume of 25.5 µl containing 50mM Tris pH 7.5, 0.05% -mercaptoethanol, 300 µM substrate peptide, 10 mM magnesium acetate and 0.02 mM [33P-ATP] (50-1000 cpm/pmole) and incubated for 30 min at room temperature. Assays are stopped by addition of 5 µl of 0.5 M (3%) orthophosphoric acid and then harvested onto P81 Unifilter plates with a wash buffer of 50 mM orthophosphoric acid.

60. PAK6 assay

PAK6 (5-20mU diluted in 50 mM Tris pH 7.5, 0.1 mM EGTA, 0.1% -mercaptoethanol, 1 mg/ml BSA) is assayed against a substrate peptide (RRRLSFAEPG) in a final volume of 25.5 µl containing 50mM Tris pH 7.5, 0.05% -mercaptoethanol, 300 µM substrate peptide, 10 mM magnesium acetate and 0.02 mM [33P-ATP] (50-1000 cpm/pmole) and incubated for 30 min at room temperature. Assays are stopped by addition of 5 µl of 0.5 M (3%) orthophosphoric acid and then harvested onto P81 Unifilter plates with a wash buffer of 50 mM orthophosphoric acid.

61. CAMKKa assay

5-20mU of CAMKKa (diluted in 50mM Tris (pH 7.5), 0.1mM EGTA, 1mg/ml BSA, 0.1%,-Mercaptoethanol) is assayed against substrate peptide (AKPKGNKDYHLQTCCGSLAYRRR) in a final volume of 25.5µl containing 50mM Tris (pH 7.5), 0.1mM EGTA, 0.5mM CaCl2, 0.3µM calmodulin, 0.1%, -Mercaptoethanol, 300µM substrate peptide, 10 mM magnesium acetate and 0.02 mM [33P-ATP]( 500-1000 cpm/pmole) and incubated for 30 min at room temperature. Assays are stopped by addition of 5µl of 0.5M (3%) orthophosphoric acid. Assays are harvested onto P81 Unifilter plates using a wash buffer of 50mM orthophosphoric acid.

62. CAMKKb assay

5-20mU of CAMKKb (diluted in 50mM Tris (pH 7.5), 0.1mM EGTA, 1mg/ml BSA, 0.1%,-Mercaptoethanol) is assayed against substrate peptide (AKPKGNKDYHLQTCCGSLAYRRR) in a final volume of 25.5µl containing 50mM Tris (pH 7.5), 0.1mM EGTA, 0.5mM CaCl2, 0.3µM calmodulin, 0.1%, -Mercaptoethanol, 300µM substrate peptide, 10 mM magnesium acetate and 0.02 mM [33P-ATP]( 500-1000 cpm/pmole) and incubated for 30 min at room temperature. Assays are stopped by addition of 5µl of 0.5M (3%) orthophosphoric acid. Assays are harvested onto P81 Unifilter plates using a wash buffer of 50mM orthophosphoric acid.

63. PIM1 assay

PIM1 (5-20mU diluted in 50 mM Tris pH 7.5, 0.1 mM EGTA, 0.1% -mercaptoethanol, 1 mg/ml BSA) is assayed against a substrate peptide (RSRHSSYPAGT) in a final volume of 25.5 µl containing 50mM Tris pH 7.5, 0.05% -mercaptoethanol, 300 µM substrate peptide, 10 mM magnesium acetate and 0.02 mM [33P-ATP] (50-1000 cpm/pmole) and incubated for 30 min at room temperature. Assays are stopped by addition of 5 µl of 0.5 M (3%) orthophosphoric acid and then harvested onto P81 Unifilter plates with a wash buffer of 50 mM orthophosphoric acid.

64. PIM3 assay

PIM3 (5-20mU diluted in 50 mM Tris pH 7.5, 0.1 mM EGTA, 0.1% -mercaptoethanol, 1 mg/ml BSA) is assayed against a substrate peptide (RSRHSSYPAGT) in a final volume of 25.5 µl containing 50mM Tris pH 7.5, 0.05% -mercaptoethanol, 300 µM substrate peptide, 10 mM magnesium acetate and 0.02 mM [33P-ATP] (50-1000 cpm/pmole) and incubated for 30 min at room temperature. Assays are stopped by addition of 5 µl of 0.5 M (3%) orthophosphoric acid and then harvested onto P81 Unifilter plates with a wash buffer of 50 mM orthophosphoric acid.

65. PLK1 assay

PLK1 (5-20mU diluted in 50 mM Tris pH 7.5, 0.1 mM EGTA, 0.1% -mercaptoethanol, 1 mg/ml BSA, 100µM Vanadate) is assayed against a substrate peptide (ISDELMDATFADQEAKKK) in a final volume of 25.5 µl containing 50mM Tris pH 7.5, 0.05% -mercaptoethanol, 10µM Vanadate, 300 µM substrate peptide, 10 mM magnesium acetate and 0.005 mM [33P-ATP] (50-1000 cpm/pmole) and incubated for 30 min at room temperature. Assays are stopped by addition of 5 µl of 0.5 M (3%) orthophosphoric acid and then harvested onto P81 Unifilter plates with a wash buffer of 50 mM orthophosphoric acid.

66. BRSK2 assay

BRSK2 (5-20mU diluted in 50 mM Tris pH 7.5, 0.1 mM EGTA, 0.1% -mercaptoethanol, 1 mg/ml BSA) is assayed against a substrate peptide (KKLNRTLSFAEPG) in a final volume of 25.5 µl containing 50mM Tris pH 7.5, 0.05% -mercaptoethanol, 300 µM substrate peptide, 10 mM magnesium acetate and 0.05 mM [33P-ATP] (50-1000 cpm/pmole) and incubated for 30 min at room temperature. Assays are stopped by addition of 5 µl of 0.5 M (3%) orthophosphoric acid and then harvested onto P81 Unifilter plates with a wash buffer of 50 mM orthophosphoric acid.

67. MELK assay

MELK (5-20mU diluted in 50 mM Tris pH 7.5, 0.1 mM EGTA, 0.1% -mercaptoethanol, 1 mg/ml BSA) is assayed against a substrate peptide (KKLNRTLSFAEPG) in a final volume of 25.5 µl containing 50mM Tris pH 7.5, 0.05% -mercaptoethanol, 200 µM substrate peptide, 10 mM magnesium acetate and 0.05 mM [33P-ATP] (50-1000 cpm/pmole) and incubated for 30 min at room temperature. Assays are stopped by addition of 5 µl of 0.5 M (3%) orthophosphoric acid and then harvested onto P81 Unifilter plates with a wash buffer of 50 mM orthophosphoric acid.

68. PKC zeta assay

PKC zeta (5-20mU diluted in 50 mM Tris pH 7.5, 0.1 mM EGTA, 0.1% -mercaptoethanol, 1 mg/ml BSA, 100µM Vanadate) is assayed against a substrate peptide (ERMRPRKRQGSVRRV) in a final volume of 25.5 µl containing 50mM Tris pH 7.5, 0.05% -mercaptoethanol, 10µM Vanadate, 300 µM substrate peptide, 10 mM magnesium acetate and 0.005 mM [33P-ATP] (50-1000 cpm/pmole) and incubated for 30 min at room temperature. Assays are stopped by addition of 5 µl of 0.5 M (3%) orthophosphoric acid and then harvested onto P81 Unifilter plates with a wash buffer of 50 mM orthophosphoric acid.

69. Aurora C assay

Aurora C (5-20mU diluted in 50 mM Tris pH 7.5, 0.1 mM EGTA, 0.1% -mercaptoethanol, 1 mg/ml BSA) is assayed against a substrate peptide (LRRLSLGLRRLSLGLRRLSLGLRRLSLG) in a final volume of 25.5 µl containing 50mM Tris pH 7.5, 0.05% -mercaptoethanol, 300 µM substrate peptide, 10 mM magnesium acetate and 0.005 mM [33P-ATP] (50-1000 cpm/pmole) and incubated for 30 min at room temperature. Assays are stopped by addition of 5 µl of 0.5 M (3%) orthophosphoric acid and then harvested onto P81 Unifilter plates with a wash buffer of 50 mM orthophosphoric acid.

70. ERK1 assay

5-20mU of ERK1 (diluted in 50mM Tris (pH 7.5), 0.1mM EGTA, 1mg/ml BSA, 0.1%,-Mercaptoethanol) is assayed against MBP in a final volume of 25.5µl containing 50mM Tris (pH 7.5), 0.1mM EGTA, 0.1%, -Mercaptoethanol, 0.33mg/ml MBP, 10 mM magnesium acetate and 0.005 mM [33P-ATP]( 500-1000 cpm/pmole) and incubated for 30 min at room temperature. Assays are stopped by addition of 5µl of 0.5M (3%) orthophosphoric acid. Assays are harvested onto P81 Unifilter plates using a wash buffer of 50mM orthophosphoric acid.
